# Supplementary material for: Analysis of temporal gene regulation of Listeria monocytogenes revealed distinct regulatory response modes after exposure to high pressure processing
Source: PubMed Central journal article supplement (PMC8045354; doi:10.1186/s12864-021-07461-0), 2021-04-14

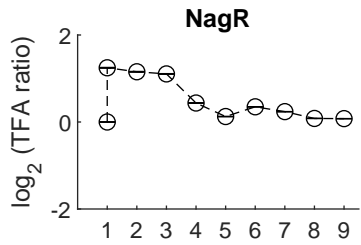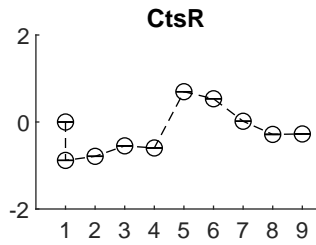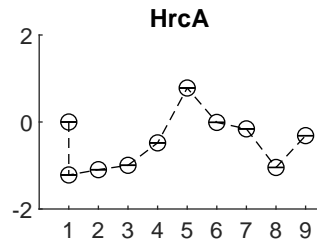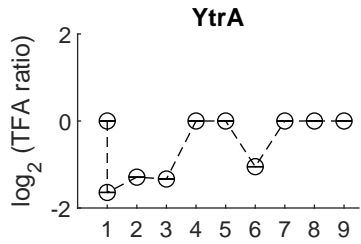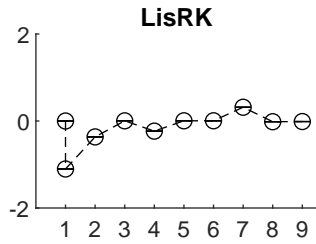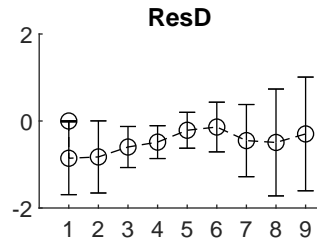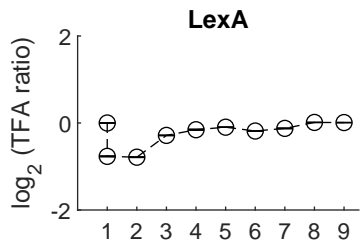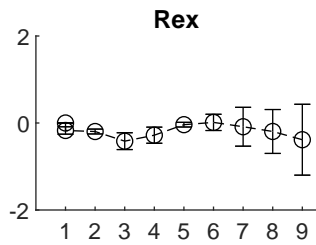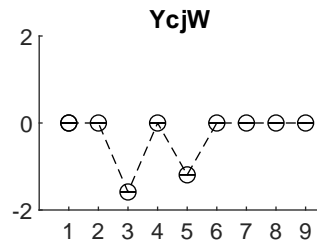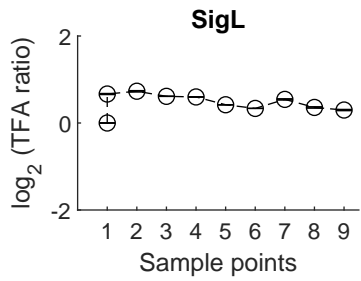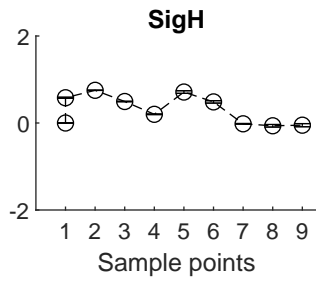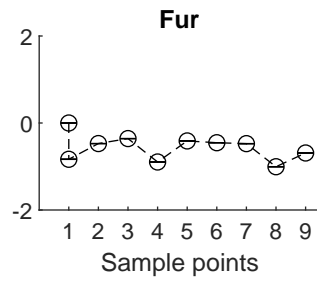

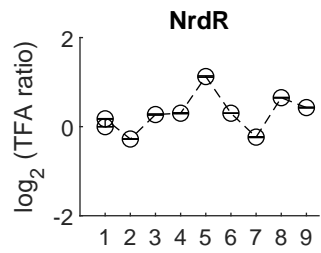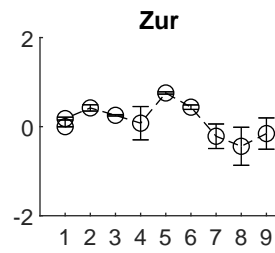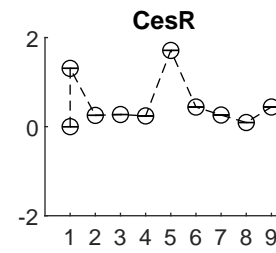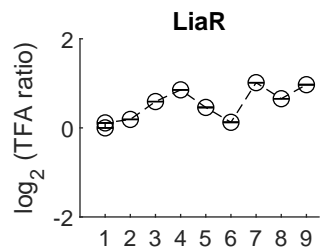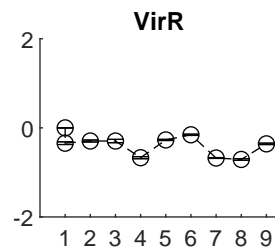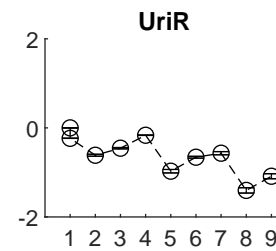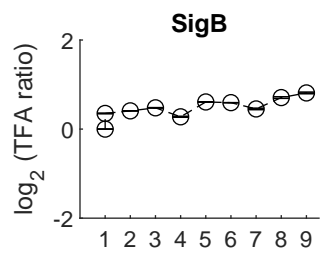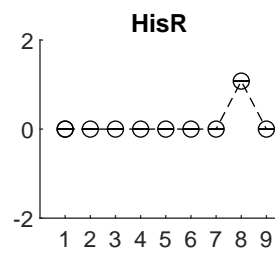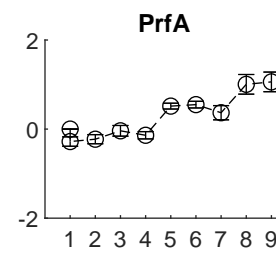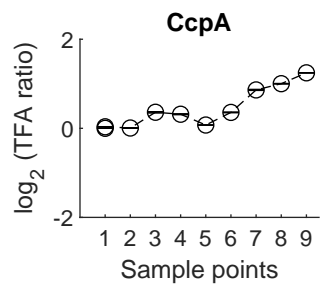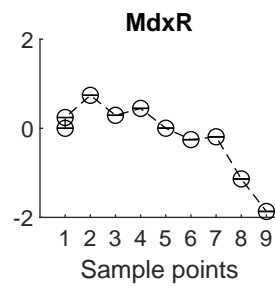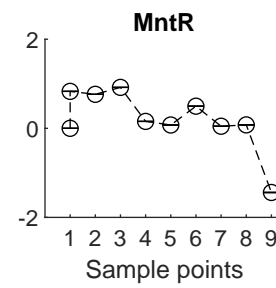

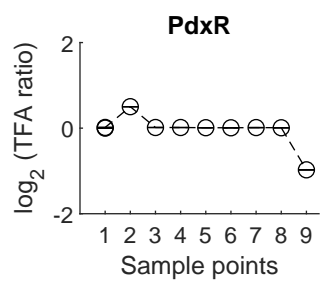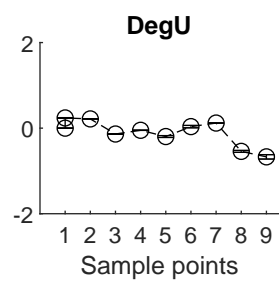

Supplement: 12864_2021_7461_MOESM2_ESM.pdf [file 12864_2021_7461_MOESM2_ESM.pdf]
